# Supplementary material
Source: PubMed Central journal article supplement (PMC2855493)
Supplement: NIHMS182584-supplement-supp_material.pdf [file NIHMS182584-supplement-supp_material.pdf]

**Supp. Table S1. Distribution of probes used for array-CGH analysis**

| Region                                 | Chromosomal location             | Size   | No. of probes | Average density of probes |
|----------------------------------------|----------------------------------|--------|---------------|---------------------------|
| <i>CFTR</i> locus <sup>a</sup>         | 116907253-117095955 <sup>b</sup> | 189 kb | 2,000         | One probe every 95 bp     |
| <i>CFTR</i> 5'-flanking <sup>c</sup>   | 114900000-116907253 <sup>b</sup> | 2 Mb   | 5,700         | One probe every 350 kb    |
| <i>CFTR</i> 3'-flanking <sup>c</sup>   | 117095955-117650000 <sup>b</sup> | 554 kb | 2,300         | One probe every 260 kb    |
| Remaining portions of the human genome | —                                | 3 Gb   | 4,000         | One probe every 750 kb    |

<sup>a</sup>Defined as in (Ellsworth et al., 2000).

<sup>b</sup>In accordance with the human chromosome 7 assembly, March 2006 (hg18).

<sup>c</sup>Arbitrarily defined in this study.

**Supp. Table S2. Ratio of intragenic deletion CNMs to duplication CNMs reported as a cause of inherited disease in selected human autosomal disease genes**

| Gene            | Chromosomal location | Gene size (kb) | Disease                                   | No. of deletions (a) | No. of duplications (b) | Ratio (a:b) |
|-----------------|----------------------|----------------|-------------------------------------------|----------------------|-------------------------|-------------|
| <i>BRCA1</i>    | 17q21                | 81             | Breast and/or ovarian cancer              | 91                   | 16                      | 5.7         |
| <i>LDLR</i>     | 19p13.2              | 45             | Hypercholesterolemia                      | 140                  | 24                      | 5.8         |
| <i>MLH1</i>     | 3p21.3               | 57             | Hereditary nonpolypotic colorectal cancer | 76                   | 7                       | 10.9        |
| <i>MSH2</i>     | 2p22-p21             | 80             | Hereditary nonpolypotic colorectal cancer | 125                  | 5                       | 25.0        |
| <i>NF1</i>      | 17q11.2              | 283            | Neurofibromatosis 1                       | 52                   | 4                       | 13.0        |
| <i>SERPING1</i> | 11q11-q13.1          | 17             | Angioneurotic edema                       | 29                   | 3                       | 9.7         |
| <i>TSC2</i>     | 16p13.3              | 41             | Tuberous sclerosis                        | 70                   | 4                       | 17.5        |

All mutations were collated from the Human Gene Mutation Database (<http://www.hgmd.org>).

**Supp. Table S3. DNA recombination-predisposing sequence features in  $\pm 20$ bp flanking each of the fully characterized 40 *CFTR* intragenic breakpoints**

| Recombination-promoting motifs or non-B-DNA forming sequences | Actual number, in the 40 breakpoints | P-value |
|---------------------------------------------------------------|--------------------------------------|---------|
| Direct repeats                                                | 7                                    | 0.001   |
| Inverted repeats                                              | 4                                    | 0.001   |
| Symmetric repeats                                             | 4                                    | 0.001   |
| R-, Y- and RY-tract                                           | 446                                  | 0.0001  |
| 'Super hotspot' CCAAR                                         | 10                                   | 0.01    |

Refer to Table 1 and Fig. 1 for the fully characterized breakpoints.
